# Supplementary material for: Electrocoiling-guided printing of multiscale architectures at single-wavelength resolution
Source: Royal Society of Chemistry journal article supplement (doi:10.1039/c9lc00145j), 2019-01-01
Supplement: c9lc00145j1.pdf [file c9lc00145j1.pdf]

## Supporting Information

# Electrocoiling-guided printing of multiscale architectures at single-wavelength resolution

Jingmei Li, <sup>ab‡</sup> Tiantian Kong, <sup>c‡</sup> Jiazuo Yu, <sup>a</sup> Kit Hang Lee, <sup>a</sup> Yuk Heng Tang, <sup>ab</sup> Ka-Wai Kwok, <sup>a</sup> Ji Tae Kim <sup>a</sup> and Ho Cheung Shum, <sup>\*ab</sup>

<sup>a</sup> Department of Mechanical Engineering, University of Hong Kong, Pokfulam Road, 999077, Hong Kong

<sup>b</sup> HKU-Shenzhen Institute of Research and Innovation (HKU-SIRI), Shenzhen, China

<sup>c</sup> China Guangdong Key Laboratory for Biomedical Measurements and Ultrasound Imaging, Department of Biomedical Engineering, Shenzhen University, 518037, China

\* Email: ashum@hku.hk

‡ The authors contribute equally to the work

1. Jet velocities as a function of the applied voltage for different polymer concentrations in precursor inks

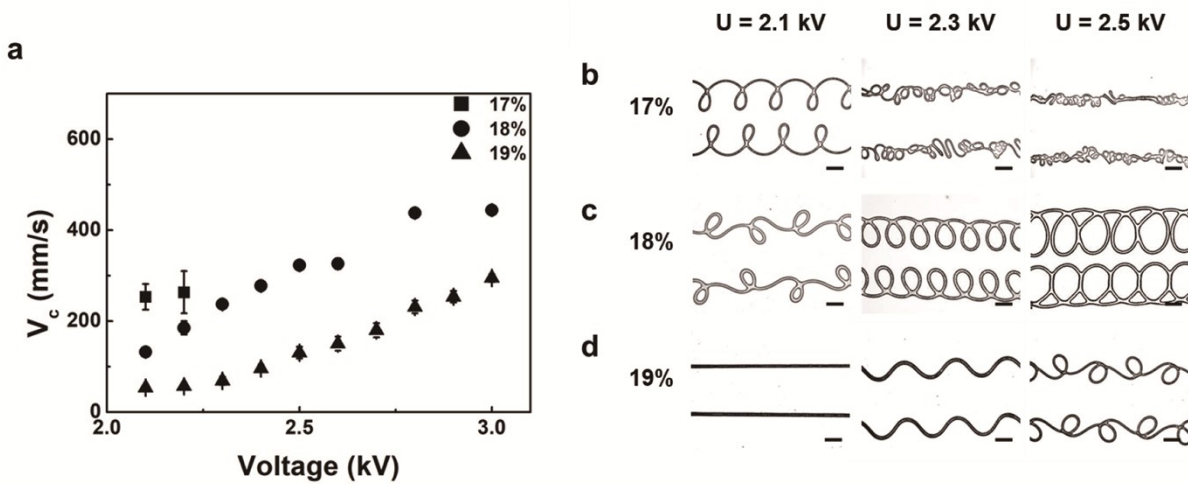

**Fig. S1 (a)** Jet velocity  $V_c$  as a function of the applied voltage for various PCL concentrations in precursor inks. The optical microscope images of different filament patterns at voltages of 2.1 kV, 2.3 kV and 2.5 kV for PCL concentration of **(b)**  $\alpha = 17$  wt. %,  $V_p = 100$  mm·s<sup>-1</sup>; **(c)**  $\alpha = 18$  wt. %,  $V_p = 50$  mm·s<sup>-1</sup>; **(d)**  $\alpha = 19$  wt. %,  $V_p = 50$  mm·s<sup>-1</sup>. For 17 wt. % PCL solution, when the applied voltage is higher than 2.3 kV, the pattern becomes chaotic. Scale bars are 300  $\mu$ m.

Scanning electron microscope (SEM) images of printed nano-filaments with different curled patterns

2. Scanning electron microscope (SEM) images of printed nano-filaments with different curled patterns

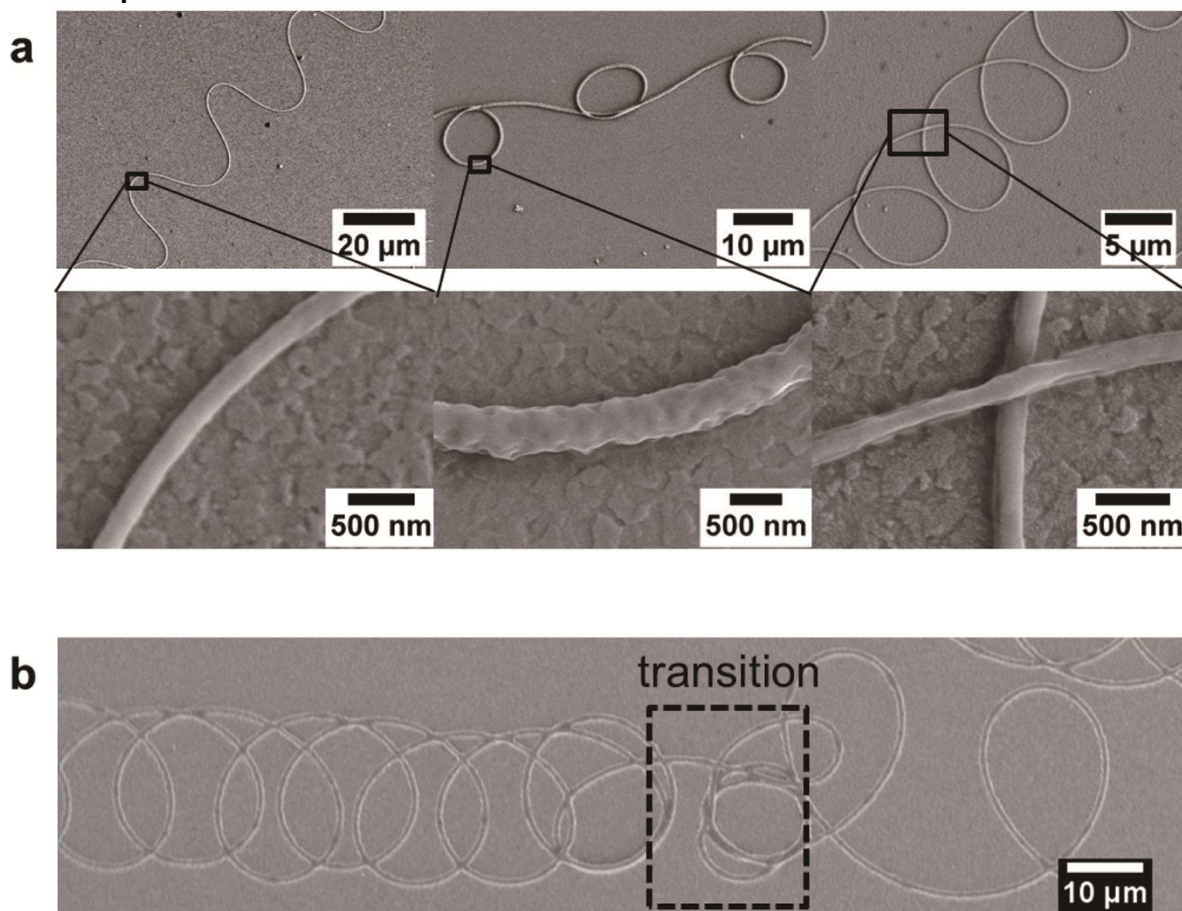

**Fig. S2** SEM images showing (a) filaments with patterns of meanders, alternating loops and translated coils, respectively, as well as (b) transition in filament pattern

### 3. Comparison of the observed and targeted velocity profiles of the translation platform

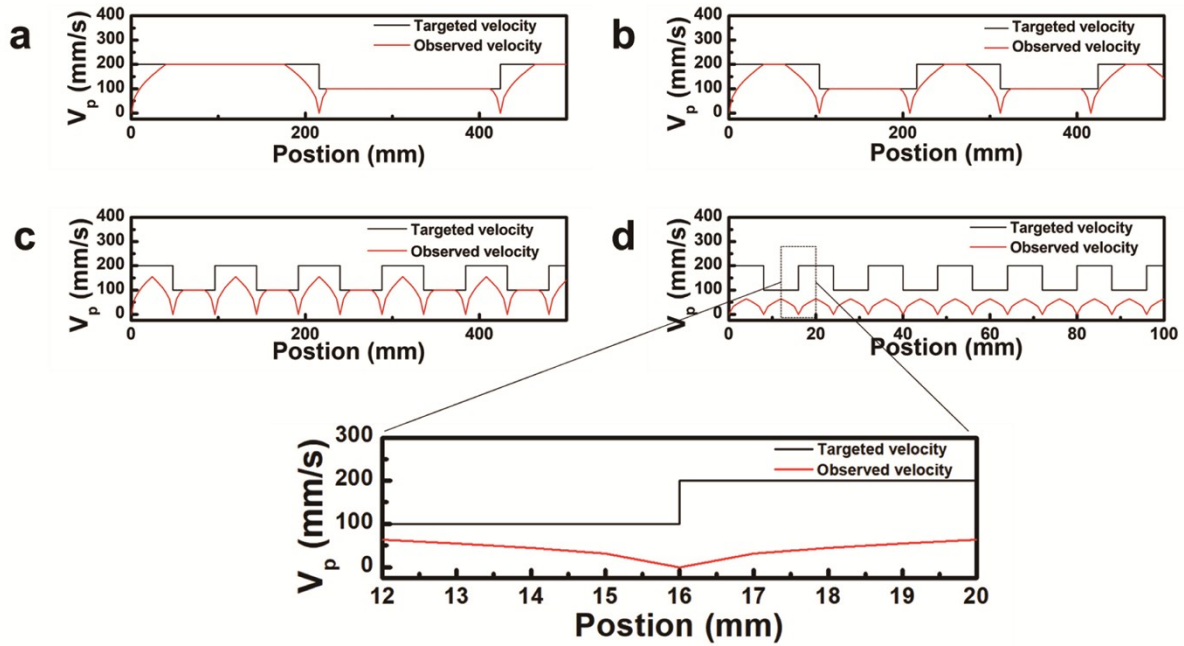

**Fig. S3** Comparison of the observed and targeted velocity profiles of the translation platform when the velocity is alternated between  $100 \text{ mm}\cdot\text{s}^{-1}$  and  $200 \text{ mm}\cdot\text{s}^{-1}$  every (a) 216 mm, (b) 104 mm, (c) 48 mm and (d) 8 mm.
